# Supplementary material for: Two-Dimensional Heterostructure of PPy/CNT–E. coli for High-Performance Supercapacitor Electrodes
Source: MDPI journal article supplement (doi:10.3390/ma15175804), 2022-08-23
Supplement: s1 [file s1]

## Supplementary Materials

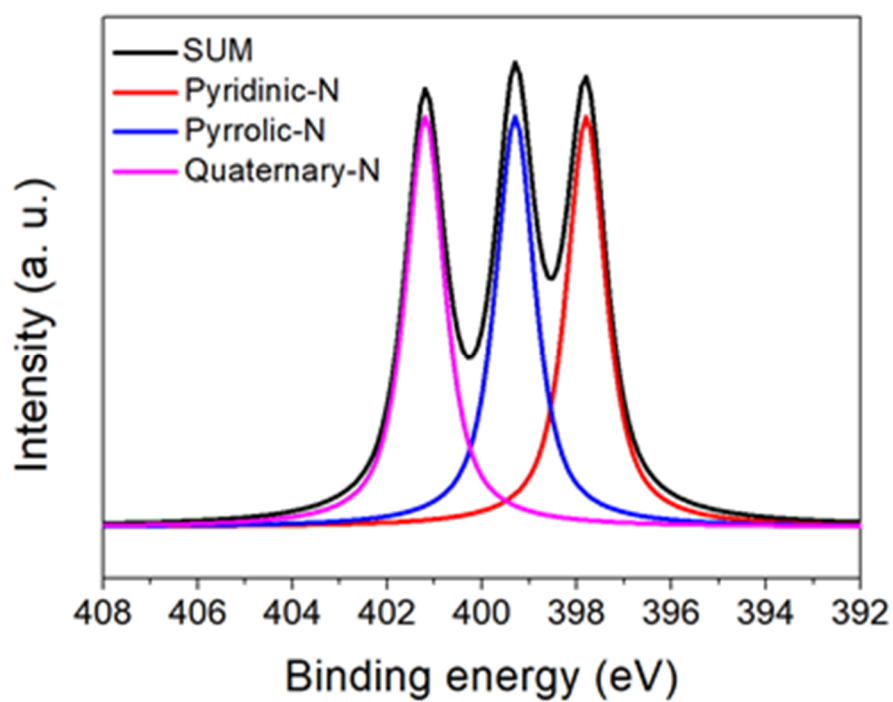

**Figure S1.** XPS survey of (a) *E. coli* bacteria.

**Table S1.** Contents of nitrogen species in *E. coli* bacteria.

|                         | Pyridinic-N | Pyrrolic-N | Quaternary-N |
|-------------------------|-------------|------------|--------------|
| <i>E. coli</i> bacteria | 33.3        | 33.3       | 33.3         |
